# Supplementary material for: Comparison of MAKO Robotic-Assisted and Manual Unicompartmental Knee Arthroplasty: A Meta- Analysis of Radiographic Precision and Short-term Functional Results
Source: Research Square preprint supplement (doi:10.21203/rs.3.rs-8571619/v1), 2026-01-27
Supplement: Supplementary file 1 [file 54dd154e561a79e202b52c96.docx]

**Table 5** **Risk of bias profiling for randomized controlled trials**

| **Methodological Assessment According to Six Domains of Potential Biases (Cochrane Risk of Bias Tool)** | | | | | | | |
| --- | --- | --- | --- | --- | --- | --- | --- |
| **RCT Study = 7** | **Random Sequence Generation** | **Allocation Concealment** | **Blinding of Participants and Personnel** | **Blinding of Outcome Assessment** | **Incomplete Outcome Data** | **Selective Reporting** | **Other Bias** |
| **Banger 2021** | Low | Low | High | Low | Low | Low | Unclear |
| **Bell 2016** | Low | Low | High | Low | Low | Low | Unclear |
| **Blyth 2017** | Low | Low | High | Low | Low | Low | Unclear |
| **Clement 2023** | Low | Low | High | Low | Low | Low | Unclear |
| **Gilmour 2018** | Low | Low | High | Low | Low | Low | Unclear |
| **Motesharei 2018** | Low | Low | High | Low | Low | Low | Unclear |
| **Yin 2021** | Low | Low | High | Low | Low | Low | Unclear |

**Table 5 legend:** Risk of bias profiling for randomized controlled trials utilizing the Cochrane standardized framework.

Abbreviations: RCT, Randomized controlled trials. The RCTs' methodological quality and basis were assessed as follows: randomization, allocation concealment, blind method, selective reporting, group similarity at baseline, incomplete outcome data, compliance, the timing of outcome assessments, and intention-to-treat analysis.
