# Supplementary material for: Comparison of MAKO Robotic-Assisted and Manual Unicompartmental Knee Arthroplasty: A Meta- Analysis of Radiographic Precision and Short-term Functional Results
Source: Research Square preprint supplement (doi:10.21203/rs.3.rs-8571619/v1), 2026-01-27
Supplement: Supplementary file 2 [file 6bd0e61e00343759c0d2c277.docx]

**Table 4 Quality appraisal scores for the non-randomized evidence**

| **Risk-of-bias assessment for the studies included in the meta-analysis (NOS)** | | | | | | | | | |
| --- | --- | --- | --- | --- | --- | --- | --- | --- | --- |
| **(nRCT) Study = 15** | **Selection** | | | | **Comparability** | **Outcome/Exposure** | | | **Score** |
| **Item 1** | **Item 2** | **Item 3** | **Item 4** | **Item 5** | **Item 6** | **Item 7** | **Item 8** |  |
| **Çabuk 2022** | ***** |  | ***** | ***** | ****** | ***** |  | ***** | **7** |
| **Cool 2019** | ***** |  | ***** | ***** | ****** | ***** | ***** | ***** | **8** |
| **FuJun 2017** | ***** |  | ***** | ***** | ****** | ***** |  | ***** | **7** |
| **Hansen 2014** | ***** |  | ***** | ***** | ****** | ***** | ***** | ***** | **8** |
| **Katherine 2016** | ***** |  | ***** | ***** | ****** | ***** | ***** | ***** | **8** |
| **Kayani 2018** | ***** |  | ***** | ***** | ****** | ***** |  | ***** | **7** |
| **Kayani 2019** | ***** |  | ***** | ***** | ****** | ***** |  | ***** | **7** |
| **Lonner 2010** | ***** |  | ***** | ***** | ****** | ***** |  | ***** | **7** |
| **Maritan 2023** | ***** |  | ***** | ***** | ****** | ***** | ***** | ***** | **8** |
| **Park 2019** | ***** |  | ***** | ***** | ****** | ***** |  | ***** | **7** |
| **St Mart 2020** | ***** |  | ***** | ***** | ****** | ***** | ***** | ***** | **8** |
| **Tan 2025** | ***** |  | ***** | ***** | ****** | ***** |  | ***** | **7** |
| **Thilak 2020** | ***** |  | ***** | ***** | ****** | ***** |  | ***** | **7** |
| **Wong 2019** | ***** |  | ***** | ***** | ****** | ***** |  | ***** | **7** |
| **Wu 2021** | ***** |  | ***** | ***** | ****** | ***** | ***** | ***** | **8** |

Table 4 legend: Quality appraisal scores for the non-randomized evidence, demonstrating scores between 7 and 8.

Item 1, Is the case definition adequate / Representativeness of the exposed cohort.

Item 2, Representativeness of the case / Selection of the non-exposed cohort.

Item 3, Selection of controls / Ascertainment of exposure to implants.

Item 4, Definition of controls / Demonstration that outcome of interest was not present at start of study.

Item 5, Comparability of cases and controls on the basis of design or analysis / Comparability of cohorts on the basis of the design or analysis.

Item 6, Ascertainment of exposure / Assessment of outcome.

Item 7, Same method of ascertainment for cases and controls / Was follow up long enough for outcomes to occur.

Item 8, Non-response rate / Adequacy of follow up of cohorts.
