# Supplementary material for: Comparison of MAKO Robotic-Assisted and Manual Unicompartmental Knee Arthroplasty: A Meta- Analysis of Radiographic Precision and Short-term Functional Results
Source: Research Square preprint supplement (doi:10.21203/rs.3.rs-8571619/v1), 2026-01-27
Supplement: Supplementary file 3 [file 7b122bf74a0f9ce9ce4ced8e.docx]

**Table 1** Operational definitions of radiographic metrics

| **Outcome** | **Definition** |
| --- | --- |
| **﻿FCCA** | The Femoral component Coronal alignment (FCCA) angle is measured as the acute angle between the femoral component and the femoral diaphyseal axis in the coronal plane on the screened short leg X-rays |
| **TCCA** | Tibial component Coronal alignment (TCCA）angle is measured as the  acute angle between a line perpendicular to the tibial axis and a line drawn across the tibial tray in the coronal plane on a short leg screened X-ray |
| **﻿MFTA** | ﻿The Mechanical femorotibial angle (MFTA) is the angle subtended by a  line extending from the center of the femoral head to the center of the knee joint to the center of the ankle mortise. |
| **TCPT** | The Tibial component posterior tilt (TCPT)is measured as the acute angle between a line drawn along the tibial tray and a line perpendicular to the tibial axis in the lateral short leg screened view |
| **LFCFEA** | The Lateral femoral component flexion-extension angle (LFCFEA) is measured as the acute angle between a line through the center of the femoral peg and the femoral axis in the lateral short leg screened view in UKA with Zimmer Biomet Oxford partial knee . However, in the Restoris® MCK UKA, there is a 30° angle between the femoral condyle axis and the femoral peg, which was  subtracted from the measured angle while evaluating the femoral component flexion/extension on Restoris® MCK UKA |

Table 1 legend: Operational definitions of radiographic metrics: MFTA, FCCA, TCCA, TCPT, and LFCFEA.Abbreviations: FCCA:Femoral component Coronal alignment; TCCA:Tibial component Sagittal alignment;MFTA: mechanical femorotibial axis; TCPT:Tibial component posterior tilt; LFCFEA: Lateral femoral component flexion-extension angle.
