# Supplementary material for: Comparison of MAKO Robotic-Assisted and Manual Unicompartmental Knee Arthroplasty: A Meta- Analysis of Radiographic Precision and Short-term Functional Results
Source: Research Square preprint supplement (doi:10.21203/rs.3.rs-8571619/v1), 2026-01-27
Supplement: Supplementary file 4 [file d3289a2281ca3260c02f4e5a.docx]

**Table 2.** **Baseline profiles and descriptive attributes of included trials**

| **The detailed baseline characteristics information** | | | | | | | | |
| --- | --- | --- | --- | --- | --- | --- | --- | --- |
| **Author/year** | **Country** | **Study type** | **MAKO-UKA/C-UKA** | | | | | |
| **Patients** | **UKAs** | **Mean age(years)** | **Womenr(％)** | **BMI** | **Follow-up time(month)** |
| **Banger 2021** | United Kingdom | RCT | 55/49 | 55/49 | NA | NA | NA | 60 |
| **Bell 2016** | United Kingdom | RCT | 70/69 | 70/69 | 62.5/61.7 | 54/56 | NA | NA |
| **Blyth 2017** | United Kingdom | RCT | 64/65 | 64/65 | NA | NA | NA | 12 |
| **Çabuk 2022** | Türkiye | RCS | 36/57 | 36/57 | 60.9/62.9 | 81/86 | NA | 12 |
| **Clement 2023** | United Kingdom | RCT | 64/65 | 64/65 | 62.1/62.5 | 44/46 | NA | 60 |
| **Cool 2019** | United States | RCS | 246/492 | 246/492 | NA | 53.66/57.32 | NA | 24 |
| **FuJun 2017** | China | RCS | 10/36 | 15/45 | 64.5/63.7 | 90/70 | 27.8/27 | 3 |
| **Gilmour 2018** | United Kingdom | RCT | 58/54 | 58/54 | 61.8/62.6 | 44.8/48.1 | NA | 24 |
| **Hansen 2014** | United States | RCS | 30/32 | 30/32 | 57.13/60.66 | 46.7/65.6 | 32.13/33.34 | 24 |
| **Katherine 2016** | United States | RCS | 87/177 | 87/177 | NA | NA | NA | 32 |
| **Kayani 2018** | United Kingdom | PCS | 60/60 | 60/60 | 64.1/65.5 | 26/27 | 28.1/27.3 | NA |
| **Kayani 2019** | United Kingdom | PCS | 73/73 | 73/73 | 65.3/66.1 | 41/39 | 28.7/27.9 | NA |
| **Lonner 2010** | United States | PCS | 31/27 | 31/27 | 64/57 | 51.6/37 | 30/28 | 3 |
| **Maritan 2023** | Italy | RCS | 52/43 | 52/43 | 60.9/61.5 | 78.8/86 | 26.2/27 | 95 |
| **Motesharei 2018** | United Kingdom | RCT | 31/39 | 31/39 | 62.7/64.6 | 38.7/38.5 | 33.86/30.85 | 12 |
| **Park 2019** | Korea | RCS | 55/57 | 55/57 | 64.8/68.4 | 80/87.7 | 25.5/25.9 | 27.8 |
| **St Mart 2020** | Australia | RCS | 2851/3093 | 2851/3093 | 65.7/65.4 | 43.6/41.1 | NA | 36 |
| **Tan 2025** | Singapore | RCS | 49/111 | 49/111 | 63.5/63.2 | 69.4/57.3 | 27.6/28.1 | 3 |
| **Thilak 2020** | India | RCS | 24/12 | 24/12 | 57.5/53.7 | 75/83.3 | NA | 1 |
| **Wong 2019** | United States | RCS | 58/118 | 58/118 | 70.4/67.9 | 49/63 | 28.2/28.7 | 3 |
| **Wu 2021** | China | RCS | 52/61 | 52/61 | 68.5/69.4 | 78.8/85.2 | NA | 24 |
| **Yin 2021** | China | RCT | 39/39 | 39/39 | 71.6/72.1 | 48.7/43.6 |  | 6 |

Table 2 legend: Baseline profiles and descriptive attributes of included trials, encompassing study design, geographic origin, and cohort demographics.

Abbreviations: BMI: body mass index; UKA: unicompartmental knee arthroplasty; RCT: Randomized control trial; RCS: Retrospective cohort study; PCS: Prospective cohort study; MAKO-UKA:MAKO-assisted unicompartmental knee arthroplasty; C-UKA: Conventional unicompartmental knee arthroplasty.
