# Supplementary material for: Comparison of MAKO Robotic-Assisted and Manual Unicompartmental Knee Arthroplasty: A Meta- Analysis of Radiographic Precision and Short-term Functional Results
Source: Research Square preprint supplement (doi:10.21203/rs.3.rs-8571619/v1), 2026-01-27
Supplement: Supplementary file 5 [file ee233edee2d3cd0d55134db7.docx]

**Table 3** Comprehensive data reporting for all synthesized clinical and radiographic endpoints.

| **Author/year** | **Outcome** |
| --- | --- |
| **Banger 2021** | OKS, AKSS Objective, AKSS Function, AKSS Total, FJS, PCS, VAS, stiffness VAS, ROM,VAS, Complication rate, revision rate, PJI rate |
| **Bell 2016** | Outlier of FCCA，Outlier of TCCA |
| **Blyth 2017** | VAS ,AKSS, OKS, FJS, SF-12 physical，SF-12 mental, complication rate, revision rate, PJI rate |
| **Çabuk 2022** | FCCA, TCCA, LFCFEA, TCPT |
| **Clement 2023** | Revision rate |
| **Cool 2019** | Revision rate |
| **FuJun 2017** | Operation time, blood loss, FCCA, TCCA, TCPT, LFCFEA, revision rate |
| **Gilmour 2018** | AKSS, OKS, FJS, VAS, Stiffness VAS, PCS, ROM, revision rate |
| **Hansen 2014** | ROM, TCCA, TCPT, revision rate, PJI rate |
| **Katherine 2016** | Revision rate，TCCA，TCPT, outliers of TCCA、TCPT, Operation time |
| **Kayani 2018** | Operation time, Complication rate |
| **Kayani 2019** | VAS pian, ROM, MFTA, Complication rate |
| **Lonner 2010** | TCCA, complication rate |
| **Maritan 2023** | Revision rate |
| **Motesharei 2018** | Revision rate |
| **Park 2019** | MFTA, FCCA, Outliers of FCCA, TCCA, outliers of TCCA, TCPT, ROM, AKSS Objective, AKSS function, WOMAC (total), WOMAC stiffness，WOMAC Pain，WOMAC Function |
| **St Mart 2020** | Revision rates, PJI rate |
| **Tan 2025** | Operation time, OKS, VAS, AKSS Objective, ROM, Complication rate |
| **Thilak 2020** | MFTA，TCPT |
| **Wong 2019** | SF-12 physical，SF-12 mental，WOMAC pain，WOMAC stiffness，WOMAC function，AKSS Function，revision rate, PJI rate, Operation time |
| **Wu 2021** | TCCA,TCPT，Operation time，blood loss, outlier of TCCA, Complications，VAS, WOMAC total |
| **Yin 2021** | Operation time，blood loss，VAS, AKSS objective, AKSS function, complication rate |

**Table 3 legend:** **Comprehensive data reporting for all synthesized clinical and radiographic endpoints..** Abbreviations: OKS, Oxford Knee Score; AKSS, American Knee Society Score; FJS, Forgotten Joint score; PCS, Pain Catastrophizing Scale; VAS, Visual analog scale; ROM, range of motion; PJI, periprosthetic joint infection; FCCA, Femoral component Coronal alignment; TCCA,Tibial component Sagittal alignment; SF-12, 12-Item Short Form Health Survey; LFCFEA, Lateral femoral component flexion-extension angle; TCPT, Tibial component posterior tilt; MFTA, mechanical femorotibial axis.
